# Supplementary material for: Novel organic–inorganic composite coordination polymers generated from new multidentate schiff-base ligand and Ag(i) salts
Source: Royal Society of Chemistry journal article supplement (doi:10.1039/b311510k), 2004-01-01
Supplement: b311510k.doc [file b311510k.doc]

# **Supplementary data**

# **Experimental Conditions for New Compounds**

**Materials and Methods.**  AgNO3 (Acros), AgSbF6 (Acros), and 2-Acetylpyrazine (Acros) and hydrazine (35 wt. % solution in water, Acros) were used as obtained without further purification. Infrared spectroscopy (IR) samples were prepared as KBr pellets, and spectra were obtained in the 4000-400 cm-1 range using a Perkin-Elmer 1600 FTIR spectrometer. 1H NMR data were collected using a JEOL FX 90Q NMR spectrometer. Chemical shifts are reported in  relative to TMS. Element analyses were performed on a Perkin-Elmer Model 240C analyzer.

*Experimental Section*

Synthesis of L1: 2-Acetylpyrazine (1.26g, 10.32 mmol) was dissolved in ethanol (30 mL), followed by dropwise addition of the hydrazine solution (35 wt. % solution in water, 0.19g, 5.16 mmol) in ethanol (8 mL). After adding two drops of formic acid, the mixture was stirred at room temperature for 48 h. Yellow crystalline solid was obtained after crystallization in 97 % yield. 1H NMR (CDCl3, ppm): 9.40 (s, 2 H, pyrazine), 8.52 (s, 4 H, pyrazine), 2.32 (s, 6 H, -CH3). IR (KBr, cm-1): 3115(w), 3095(m), 2930(m), 2845(w), 1702(m), 1616(s), 1520(s), 1470(s), 1410(s), 1368(s), 1300(m), 1170(s), 1108(s), 1050(s), 1018(s), 850(s). Anal. Calc. for C12H12N6: C, 60.00 H, 5.00; N, 35.00 %. Found: C, 59.89; H, 5.11; N, 34.92 %.

Synthesis of **1**. A ethanol solution (5 mL) of Ag(NO3) (14.8 mg, 0.087 mmol) was slowly diffused into a chloroform solution (5 mL) of L1 (10.5 mg, 0.044 mmol). Bright yellow crystals formed in about two weeks. The yield was 66 %. IR (cm-1, KBr pellet): 3100(m), 1620(m), 1520(m), 1475(m), 1400(vs), 1370(vs), 1325(vs), 1300(vs), 1168(s), 1130(s), 1110(s), 1050(m), 1020(s), 850(s), 650(s). Anal. Calcd for C39H39Ag6Cl9N24O18: C, 22.30; H, 1.86; N, 16.01 %. Found: C, 22.31; H, 1.85; N, 15.99 %.

Synthesis of **2**. A methanol solution (5 mL) of Ag(SbF6) (19.2 mg, 0.056 mmol) was slowly diffused into a methylene chloride solution (5 mL) of L1 (6.7 mg, 0.027 mmol). Colorless crystals formed in about two weeks. The yield was 67 %. IR (cm-1, KBr pellet): 3100(m), 1620(s), 1520(m), 1473(s), 1410(s), 1370(s), 1300(w), 1170(s), 1110(s), 1050(m), 1020(s), 850(s), 665(s). Anal. Calcd for C25H26Ag2Cl2F12N12Sb2: C, 23.95; H, 2.08; N, 13.41 %. Found: C, 23.97; H, 2.10; N, 13.39 %.

Figures of luminescent spectra for compounds **1** and **2**:

Compound **1** Compound **2**
